# Supplementary material for: Construction of stable MoxSy/CeO2 heterostructures for the electrocatalytic hydrogen evolution reaction
Source: Royal Society of Chemistry journal article supplement (doi:10.1039/d1cp05466j), 2022-01-01
Supplement: d1cp05466j9.pdf [file d1cp05466j9.pdf]

# **Construction of stable $\text{Mo}_x\text{S}_y/\text{CeO}_2$ heterostructures for electrocatalytic hydrogen evolution reaction**

Hongxian Liu<sup>a</sup>, Pai Wang<sup>a</sup>, Jinxiu Jiang<sup>a</sup>, Gang Cheng<sup>b</sup>, Tongwei Wu<sup>a</sup> and Yanning  
Zhang<sup>a\*</sup>

<sup>a</sup>Institute of Fundamental and Frontier Sciences, University of Electronic Science and  
Technology of China, Chengdu 610054, Sichuan, China.

<sup>b</sup>Institute of Energy Research, Jiangxi Academy of Sciences, Nanchang, P. R. China

Table S1. The calculated cohesive energy and binding energy.

|                                | $E_b$ (eV/atom) | $E_c$ (eV/atom) |
|--------------------------------|-----------------|-----------------|
| 2H-MoS <sub>2</sub>            | 0.51            | -5.10           |
| Mo <sub>3</sub> S <sub>4</sub> | -0.69           | -4.24           |
| Mo <sub>4</sub> S <sub>3</sub> | -1.45           | -4.00           |
| Mo <sub>4</sub> S <sub>4</sub> | -0.91           | -4.28           |
| Mo <sub>6</sub> S <sub>8</sub> | -0.08           | -4.85           |

The calculated binding energy per atom ( $E_b$ ) and cohesive energy per atom ( $E_c$ ) are defined as

$$E_b = (xE_{\text{Mo}} + yE_{\text{S}} - E_{\text{Mo}_x\text{S}_y})/(x+y) \quad (1)$$

$$E_c = (E_{\text{Mo}_x\text{S}_y} - xE_{\text{Mo}} - yE_{\text{S}})/(x+y) \quad (2)$$

where  $x$  and  $y$  are the numbers of Mo and S atoms. Please note that the  $E_{\text{Mo}}$  and  $E_{\text{S}}$  of Equ. (1) are the energy of Mo and S atoms in their most stable states.<sup>1, 2</sup> Unlike the Equ. (1),  $E_{\text{Mo}}$  and  $E_{\text{S}}$  in Equ. (2) are the energy of isolated Mo and S atoms, respectively.<sup>3</sup> The energy of isolated Mo/S atoms are calculated by a symmetry broken spin polarized method in a slightly non-cubic cells,  $12 \text{ \AA} \times 13 \text{ \AA} \times 14 \text{ \AA}$ .

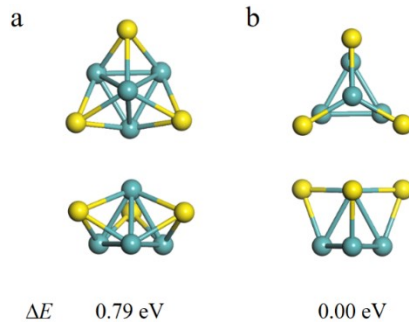

Fig. S1 The optimized and relative energy of free-standing Mo<sub>4</sub>S<sub>3</sub> structures, (a) Mo<sub>4</sub>( $\mu_3$ -S)<sub>3</sub>, (b) Mo<sub>4</sub>( $\mu_2$ -S)<sub>3</sub>. The Mo and S atoms are denoted by cyan and yellow, respectively.

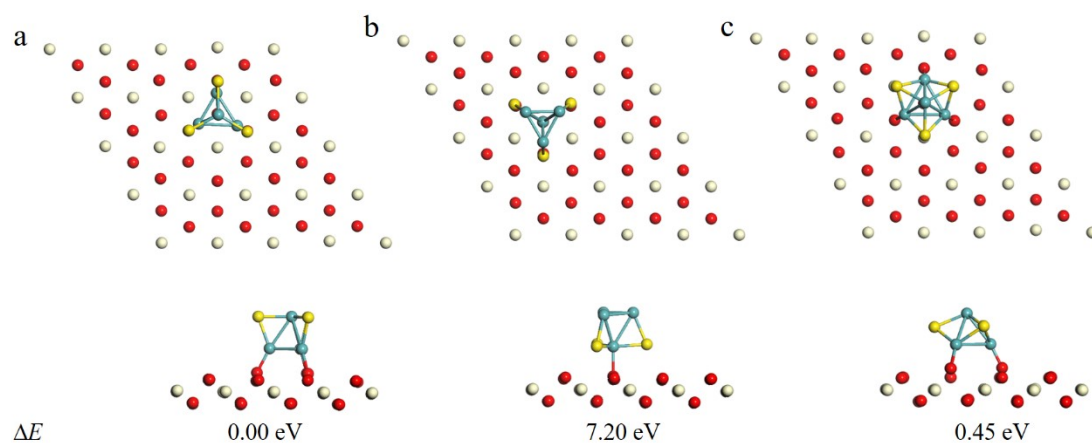

Fig. S2 The relative energy of  $\text{Mo}_4\text{S}_3/\text{CeO}_2$  structures, (a)  $\text{Mo}_4(\mu_2\text{-S})_3$ -config. 1, (b)  $\text{Mo}_4(\mu_2\text{-S})_3$ -config. 2, (c)  $\text{Mo}_4(\mu_3\text{-S})_3$ . The Mo and S atoms are denoted by cyan and yellow, respectively.

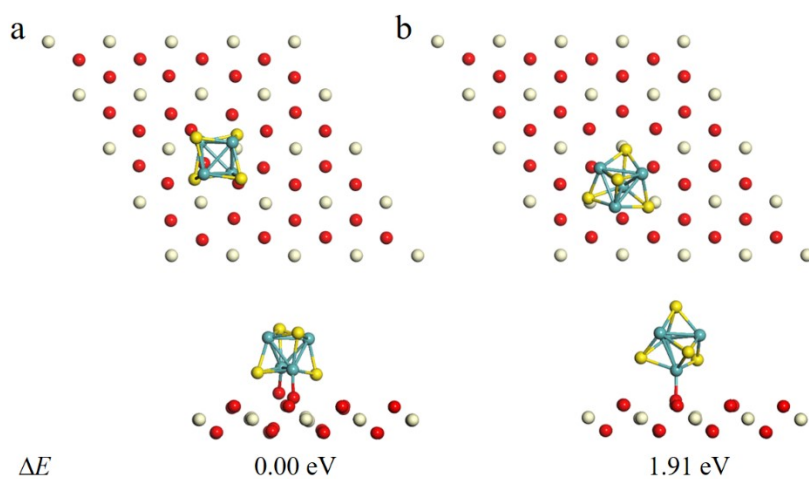

Fig. S3 The relative energy of  $\text{Mo}_4\text{S}_4/\text{CeO}_2$  structures, (a)  $\text{Mo}_4\text{S}_4$ -config.1, (b)  $\text{Mo}_4\text{S}_4$ -config. 2. The Mo, S atoms are denoted by cyan and yellow, respectively.

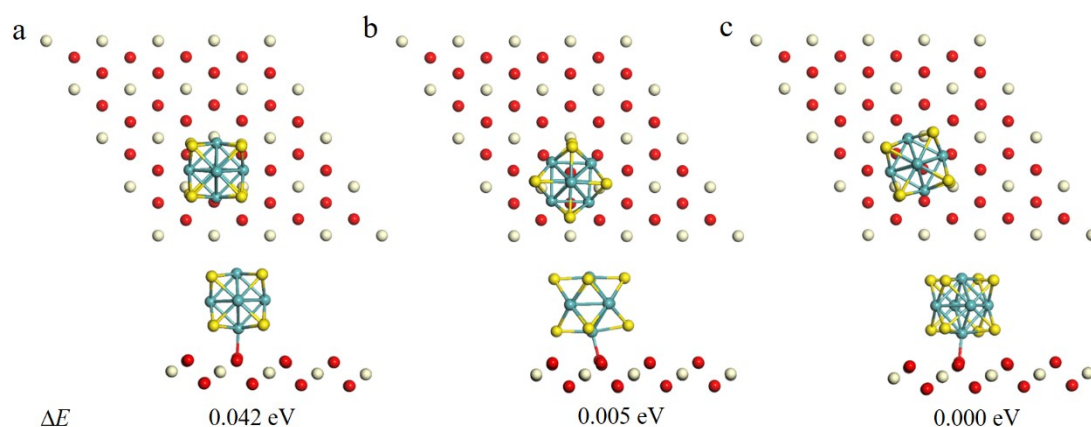

Fig. S4 The relative energy of  $\text{Mo}_6\text{S}_8/\text{CeO}_2$  structures, (a)  $\text{Mo}_6\text{S}_8$ -config. 1, (b)  $\text{Mo}_6\text{S}_8$ -config. 2, (c)  $\text{Mo}_6\text{S}_8$ -config. 3. The Mo and S atoms are denoted by cyan and yellow, respectively.

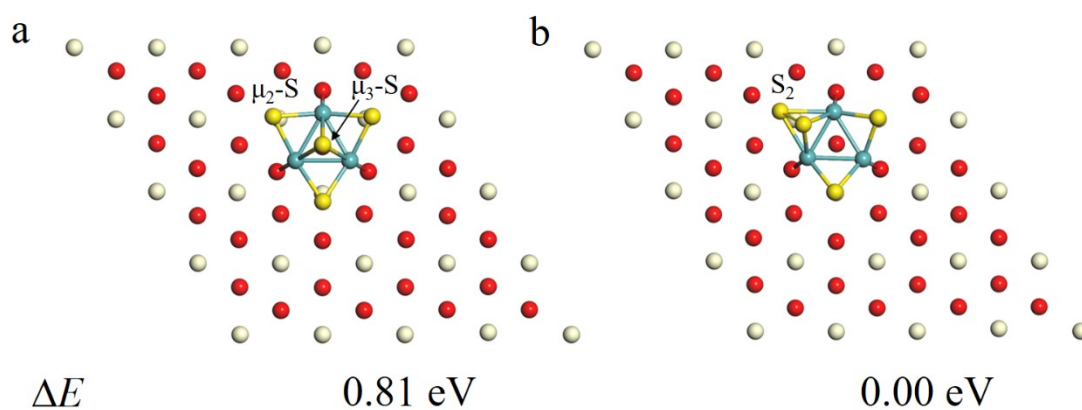

Fig. S5 The relative energy of  $\text{Mo}_3\text{S}_4/\text{CeO}_2$  structures, (a) initial structure, (b) AIMD reconstructed structure.

Table S2. The Bader charge and magnetic moment of inner-layer  $\text{Ce}^{4+}$  and reduced  $\text{Ce}^{3+}$  on  $\text{Mo}_x\text{S}_y/\text{CeO}_2$ .

|                                      |                             | Inner-layer $\text{Ce}^{4+}$ | Reduced $\text{Ce}^{3+}$ |      |      |
|--------------------------------------|-----------------------------|------------------------------|--------------------------|------|------|
|                                      |                             |                              |                          |      |      |
| $\text{Mo}_3\text{S}_4/\text{CeO}_2$ | Bader charge (e)            | 9.60                         | 9.92                     | 9.93 | 9.90 |
|                                      | Magnetic moment ( $\mu_B$ ) | 0.00                         | 0.95                     | 0.95 | 0.95 |
| $\text{Mo}_4\text{S}_3/\text{CeO}_2$ | Bader charge (e)            | 9.60                         | 9.93                     | 9.93 | 9.93 |
|                                      | Magnetic moment ( $\mu_B$ ) | 0.00                         | 0.94                     | 0.95 | 0.95 |
| $\text{Mo}_4\text{S}_4/\text{CeO}_2$ | Bader charge (e)            | 9.60                         | 9.89                     | 9.86 |      |
|                                      | Magnetic moment ( $\mu_B$ ) | 0.00                         | 0.95                     | 0.95 |      |

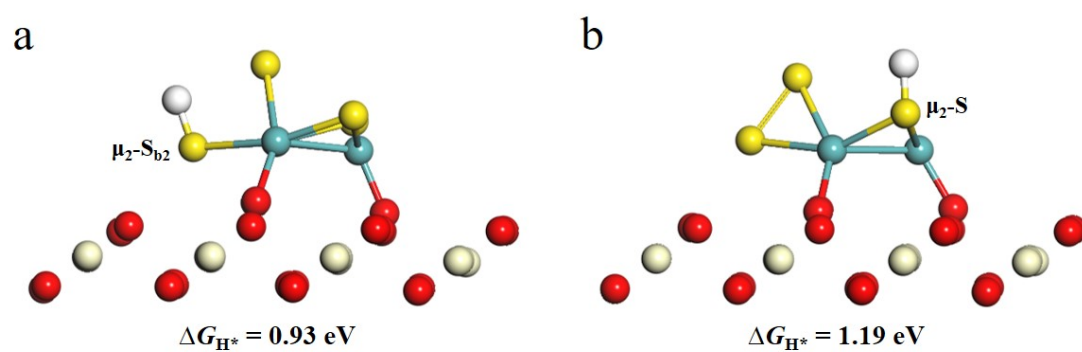

Fig. S6 The optimized structures of  $\text{Mo}_3\text{S}_4/\text{CeO}_2$  for hydrogen adsorption, (a)  $\mu_2\text{-S}_{b2}$ , (b)  $\mu_2\text{-S}$ .

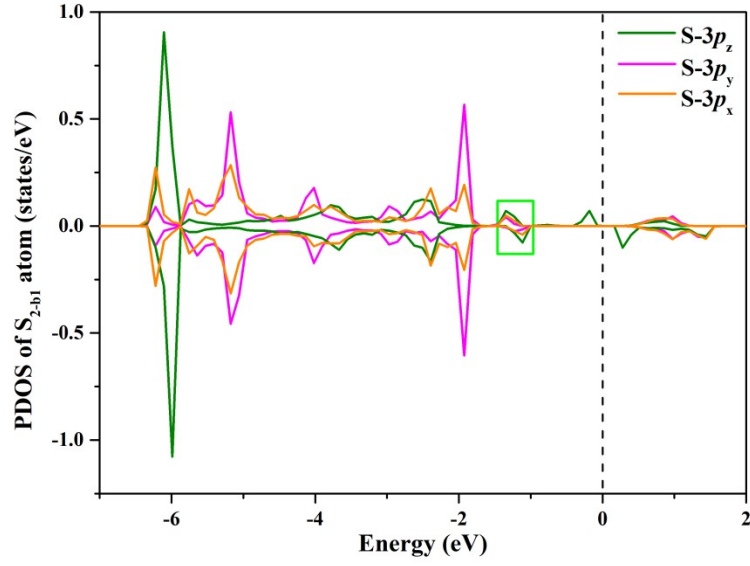

Fig. S7 The PDOS of  $S_{b1}$  atom on  $Mo_3S_4/CeO_2$ .

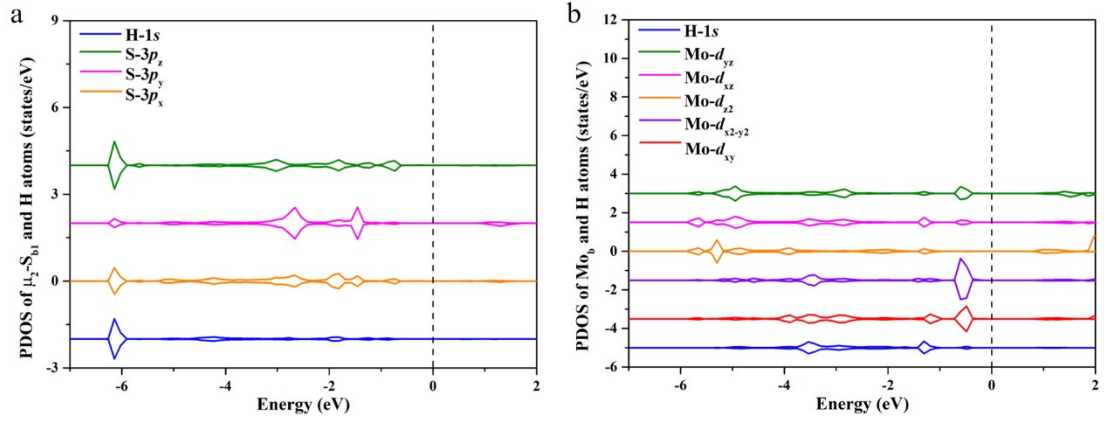

Fig. S8 The PDOS of  $S_{b1}$  and  $Mo_b$  atoms when interact with the H atoms on  $Mo_3S_4/CeO_2$ .

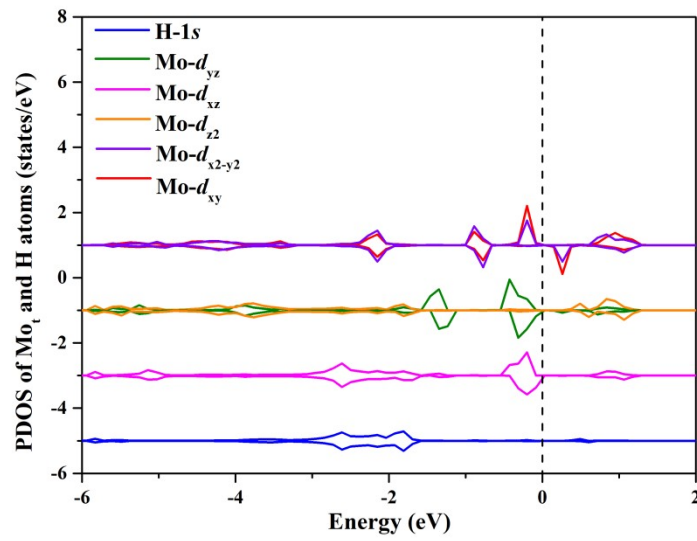

Fig. S9 The PDOS of  $Mo_b$  atom when interacts with the H atoms on  $Mo_4S_4/CeO_2$ .

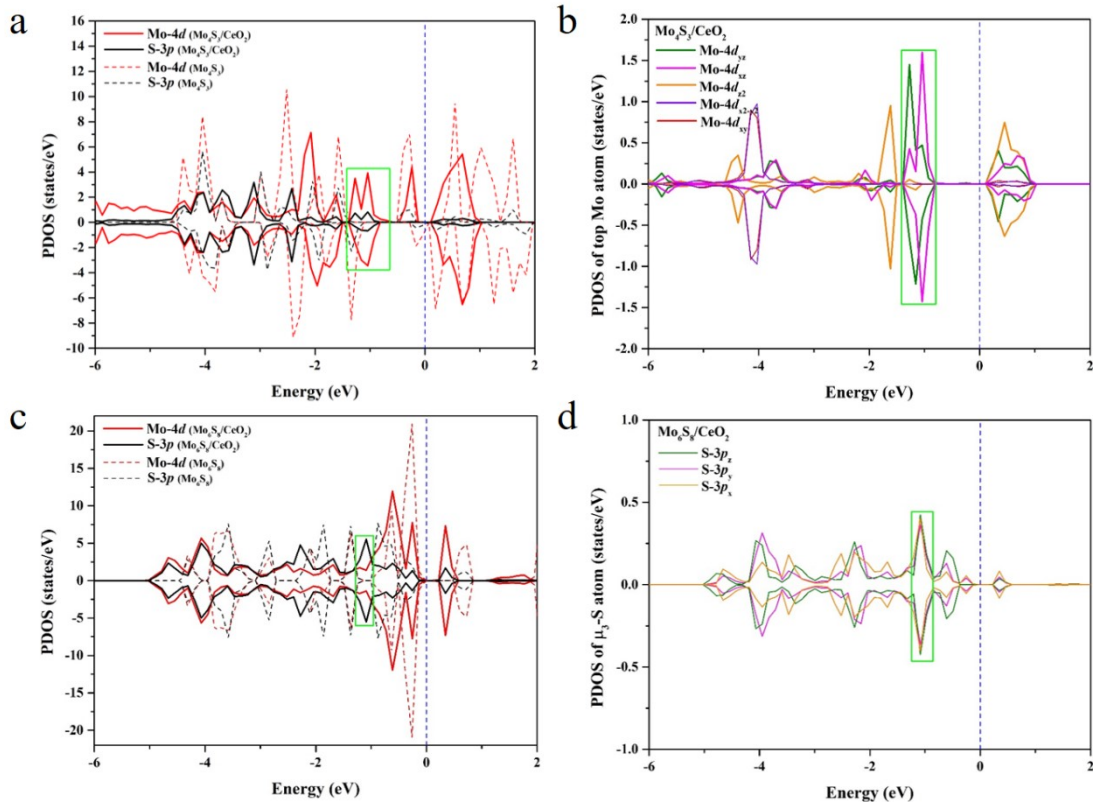

Fig. S10 The PDOS of (a)  $\text{Mo}_4\text{S}_3$ , (b)  $\text{Mo}_b$  atom on  $\text{Mo}_4\text{S}_3/\text{CeO}_2$ , (c)  $\text{Mo}_6\text{S}_8$ , (d)  $\mu_3\text{-S}$  atom on  $\text{Mo}_6\text{S}_8/\text{CeO}_2$ . The solid lines represent the PDOS of adsorbed  $\text{Mo}_x\text{S}_y$  clusters, and the dotted lines represent the PDOS of free-standing  $\text{Mo}_x\text{S}_y$  clusters.

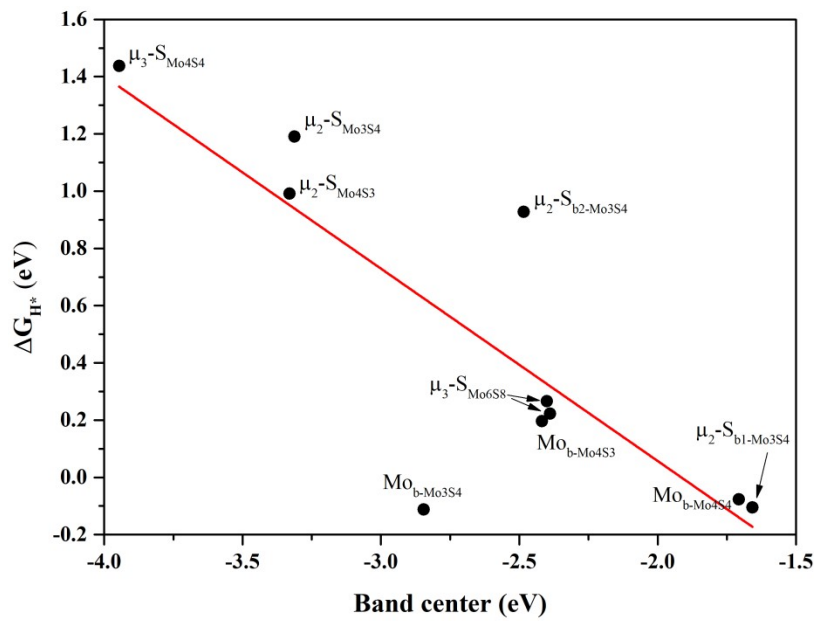

Fig. S11 The relation between  $\Delta G_{\text{H}^*}$  and the  $p/d$  band center of  $\text{Mo}_x\text{S}_y/\text{CeO}_2$ . The  $p$  band center of  $\mu_2\text{-S}_{b1}\text{-Mo}_3\text{S}_4$  and  $\mu_2\text{-S}_{b2}\text{-Mo}_3\text{S}_4$  were calculated by performing single-point self-consistent calculations.

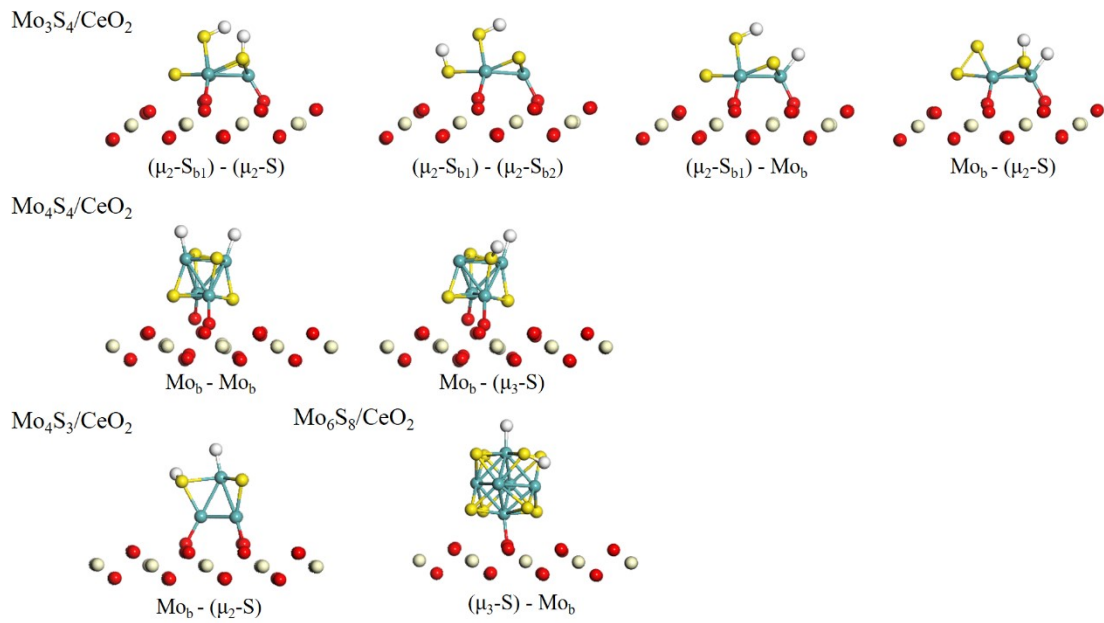

Fig. S12 The optimized structures of  $\text{Mo}_x\text{S}_y/\text{CeO}_2$  with two H atoms absorption.

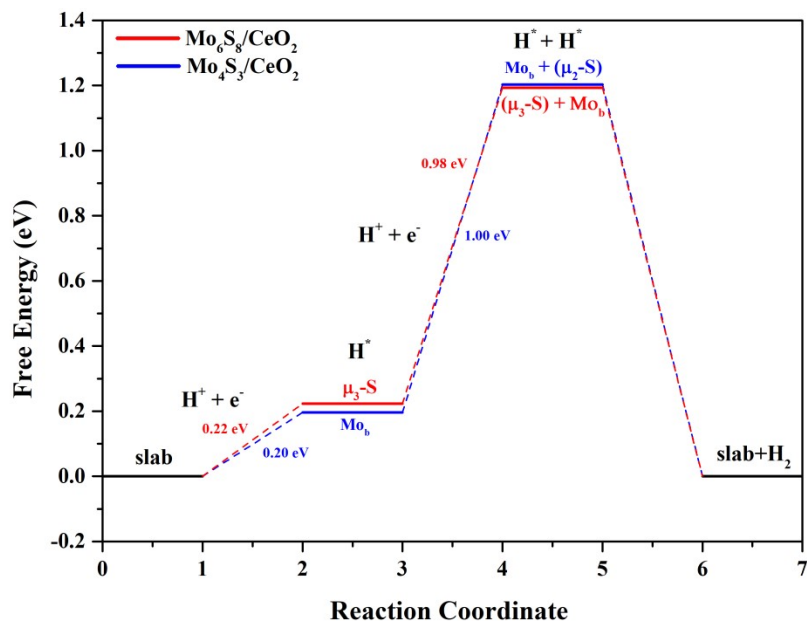

Fig. S13 The calculated reaction pathways with Volmer-Tafel reaction mechanisms of  $\text{Mo}_4\text{S}_3/\text{CeO}_2$  and  $\text{Mo}_6\text{S}_8/\text{CeO}_2$ .

## References

1. A. Arab and M. Habibzadeh, *Journal of Nanostructure in Chemistry*, 2016, **6**, 111-119.
2. K. Gao, X.-R. Zhang, Z.-C. Yu and P.-Y. Huo, *Computational and Theoretical Chemistry*, 2018, **1138**, 168-175.
3. D. W. Zhou, J. S. Liu, S. H. Xu and P. Peng, *Physica B: Condensed Matter*, 2010, **405**, 2863-2868.
